# Supplementary figures and images for: A new X-ray transparent flow-through reaction cell for a μ-CT-based concomitant surveillance of the reaction progress of hydrothermal mineral-fluid interactions
Source: Copernicus journal article supplement (doi:10.5194/se-2016-25), 2016-02-03

**0 d**

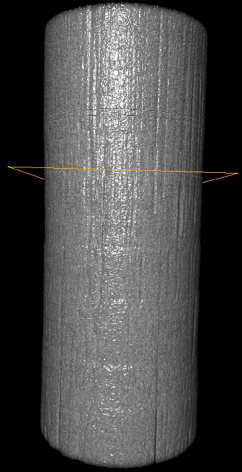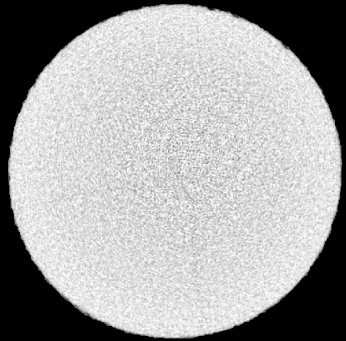

solids 99.4  
voids 0.6

**2 d**

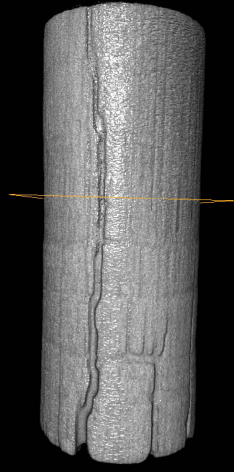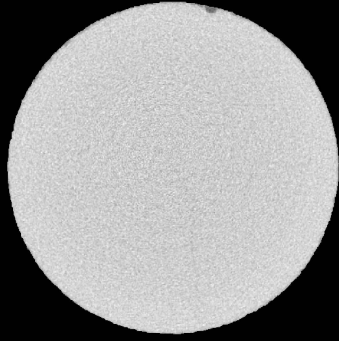

98.9  
1.1

**4 d**

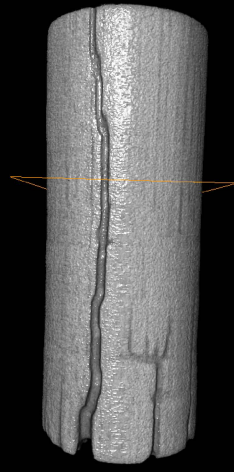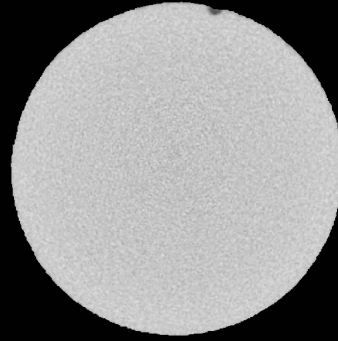

98.5  
1.5

**10 d**

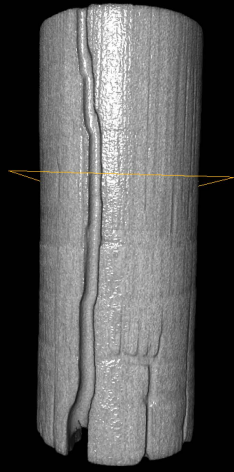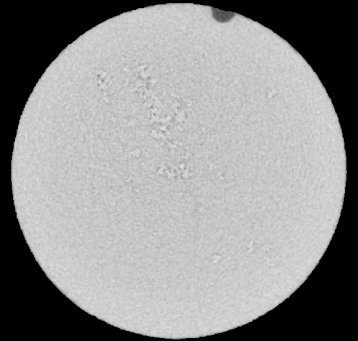

97.4 vol.%  
2.4 vol.%

**17 d**

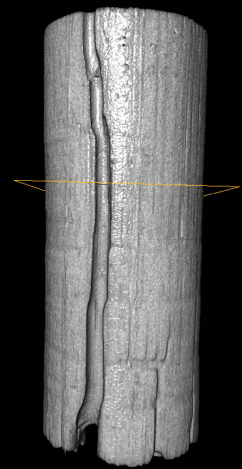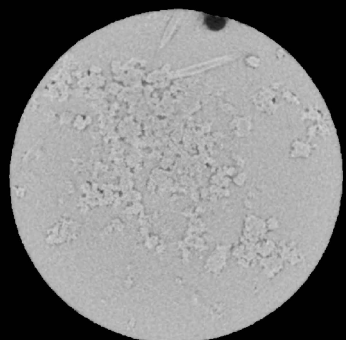

solids 95.9  
voids 4.1

**22 d**

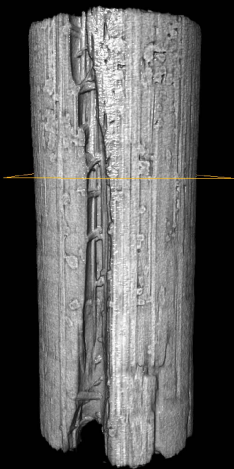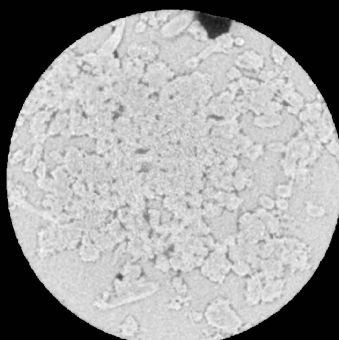

93.4  
6.6

**29 d**

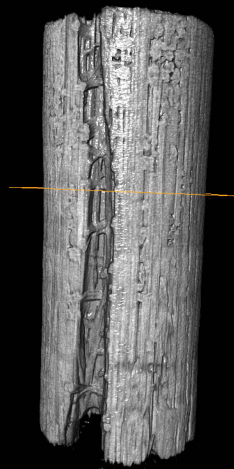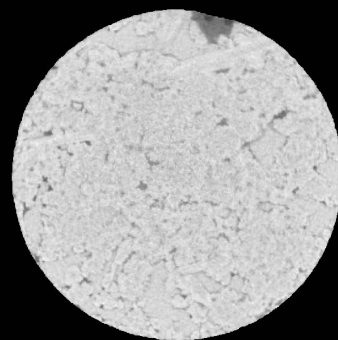

91.3  
8.7

**35 d**

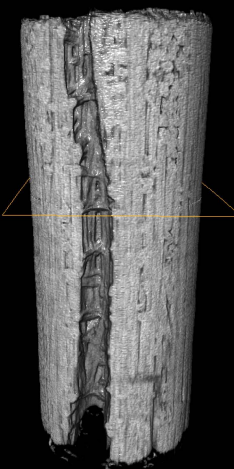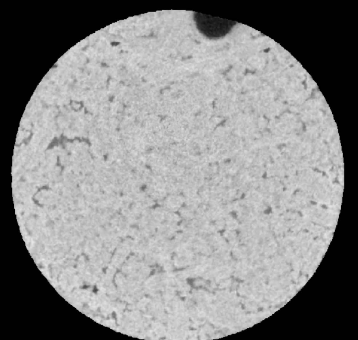

89.3 vol.%  
10.7 vol.%

Supplement: Supplementary file 1 [file se-2016-25-supplement.pdf]
